3. Avidan MS, Zhang L, Burnside BA, Finkel KJ, Searleman AC, Selvidge JA, Saager L, Turner MS, Rao S, Bottros M, Hantler C, Jacobsohn E, Evers AS: Anesthesia awareness and the bispectral index. *N Engl J Med* 2008; 358:1097–108
4. Myles PS, Leslie K, McNeil J, Forbes A, Chan MT: Bispectral index monitoring to prevent awareness during anaesthesia: The B-Aware randomised controlled trial. *Lancet* 2004; 363:1757–63
5. Myles PS, Gin T: Statistical Methods for Anaesthesia and Intensive Care, 1st edition. Edinburgh, Butterworth-Heinemann, 2000, pp 115
6. Avidan MS, Mashour GA: Prevention of intraoperative awareness with explicit recall: Making sense of the evidence. *ANESTHESIOLOGY* 2013; 118:449–56
7. Puri GD, Murthy SS: Bispectral index monitoring in patients undergoing cardiac surgery under cardiopulmonary bypass. *Eur J Anaesthesiol* 2003; 20:451–6
8. Zhang C, Xu L, Ma YQ, Sun YX, Li YH, Zhang L, Feng CS, Luo B, Zhao ZL, Guo JR, Jin YJ, Wu G, Yuan W, Yuan ZG, Yue Y: Bispectral index monitoring prevent awareness during total intravenous anesthesia: A prospective, randomized, double-blinded, multi-center controlled trial. *Chin Med J* 2011; 124:3664–9
9. Långsjö JW, Alkire MT, Kaskinoro K, Hayama H, Maksimow A, Kaisti KK, Aalto S, Aantaa R, Jääskeläinen SK, Revonsuo A, Scheinin H: Returning from oblivion: Imaging the neural core of consciousness. *J Neurosci* 2012; 32:4935–43
10. Mashour GA, Tremper KK, Avidan MS: Protocol for the “Michigan Awareness Control Study”: A prospective, randomized, controlled trial comparing electronic alerts based on bispectral index monitoring or minimum alveolar concentration for the prevention of intraoperative awareness. *BMC Anesthesiol* 2009; 9:7
11. Mashour GA, Esaki RK, Vandervest JC, Shanks A, Kheterpal S: A novel electronic algorithm for detecting potentially insufficient anesthesia: Implications for the prevention of intraoperative awareness. *J Clin Monit Comput* 2009; 23:273–7
12. Avidan MS, Jacobsohn E, Glick D, Burnside BA, Zhang L, Villafranca A, Karl L, Kamal S, Torres B, O'Connor M, Evers AS, Gradwohl S, Lin N, Palanca BJ, Mashour GA; BAG-RECALL Research Group: Prevention of intraoperative awareness in a high-risk surgical population. *N Engl J Med* 2011; 365:591–600

(Accepted for publication January 17, 2013.)

## Let's Go Down the Correct Path(way)

To the Editor:

“Acquired Liver Injury in the Intensive Care Unit” by Lescot *et al.*<sup>1</sup> is an excellent discussion of the multifaceted causes of liver injury. One correction is in order, however. The review incorrectly states that the international normalized ratio reflects intrinsic pathway activity. It is the activity of the *extrinsic* coagulation pathway, often now referred to as the tissue factor pathway, that is measured by the international normalized ratio and initiates the coagulation cascade.<sup>2</sup> An understanding of the specific pathway measured by a coagulation test is paramount to the treatment of defects secondary to liver disease. It should also be pointed out that the international normalized ratio, one component of the model for end-stage liver disease scoring used to prioritize liver transplantation waiting lists, can be highly variable depending on the laboratory analyzing the sample.<sup>3</sup>

**Matthew R. Johnson, M.D., Mark J. Rice, M.D.\*** University of Florida College of Medicine, Gainesville, Florida. [mrice@anest.ufl.edu](mailto:mrice@anest.ufl.edu)

## References

1. Lescot T, Karvellas C, Beaussier M, Magder S: Acquired liver injury in the intensive care unit. *ANESTHESIOLOGY* 2012; 117:898–904
2. Hoffman M: Remodeling the blood coagulation cascade. *J Thromb Thrombolysis* 2003; 16:17–20
3. Trotter JF, Brimhall B, Arjal R, Phillips C: Specific laboratory methodologies achieve higher model for endstage liver disease (MELD) scores for patients listed for liver transplantation. *Liver Transpl* 2004; 10:995–1000

(Accepted for publication January 23, 2013.)

In Reply:

We thank Drs. Johnson and Rice for correcting our inadvertent error from our article<sup>1</sup> and agree with their comments.

**Thomas Lescot, M.D., Ph.D.,\* Constantine Karvellas, M.D., F.R.C.P.C., Marc Beaussier, M.D., Ph.D., Sheldon Magder, M.D., F.R.C.P.C.** \*Royal Victoria Hospital, McGill University Health Center, Montreal, Quebec, Canada. [thomas.lescot@sat.aphp.fr](mailto:thomas.lescot@sat.aphp.fr)

## Reference

1. Lescot T, Karvellas C, Beaussier M, Magder S: Acquired liver injury in the intensive care unit. *ANESTHESIOLOGY* 2012; 117:898–904

(Accepted for publication January 23, 2013.)

## Intralipid: The New Magic Bullet in Cardioprotection?

To the Editor:

In two recent publications in *ANESTHESIOLOGY*, Dr. Eghbali's group reports the attenuation of myocardial reperfusion injury in rodents by intralipid administered on reperfusion.<sup>1,2</sup> Taken together with another study by the same group in which intralipid prevents and even rescues pulmonary hypertension,<sup>3</sup> and the serendipitous landmark discoveries of lipid rescue therapy against bupivacaine-induced cardiotoxicity first in dogs<sup>4</sup> and then humans,<sup>5</sup> intralipid appears to have become a new magic bullet for cardioprotection. Nevertheless, many questions remain. Li *et al.*<sup>2</sup> state that intralipid acts through the phosphorylation of Akt/extracellular signal-regulated kinase-1/glycogen

Research funding provided in part by the Department of Veterans Affairs, Washington, D.C. (CARA-026-10F to M.L.R.), the National Institutes of Health, Bethesda, Maryland (5R01 HL098490-03 to M.L.R. and NIH R01 HL092071 to M.V.P.), and institutional funds.

synthase kinase-3 $\beta$  and ultimately leads to delayed opening of the mitochondrial permeability transition pore (mPTP). In contrast to the mPTP inhibitor cyclosporine-A or other proven postconditioning agents,<sup>6,7</sup> however, intralipid is a mixture of various different compounds: fractionated soybean oil, fractionated egg phospholipids, and glycerol.<sup>8,9</sup> Which of these compounds is ultimately responsible for the cardioprotective effect? Is this truly a receptor-mediated effect, or could it simply be a metabolic switch from glucose to fatty acid metabolism that paradoxically protects the heart as suggested in another of Dr. Eghbali's publications<sup>10</sup> and by us?<sup>11,12</sup> Since intralipid is metabolized *in vivo* and its contents may reach the heart in a very different form<sup>8</sup> than in the isolated heart preparation, both models are difficult to compare directly in this context. Lastly, as much as delayed mPTP opening appears to be a common end-effector in many different animal models of protection against myocardial reperfusion injury,<sup>13</sup> Li *et al.*<sup>2</sup> show once more that inhibition of the mPTP may be necessary but by far not sufficient for cardioprotection: although not formally done in their study, the extent of delayed mPTP opening in control, cyclosporine-A-, and intralipid-treated animals does not correlate with the observed degree of functional and tissue protection in the three groups. Therefore, despite these interesting findings, it may still be a long way to a potential clinical usage of intralipid in preventing myocardial reperfusion injury.

**Matthias L. Riess, M.D., Ph.D.,\* Mihai V. Podgoreanu, M.D.** \*Veterans Affairs Medical Center, and Medical College of Wisconsin, Milwaukee, Wisconsin. mriess@mcw.edu

## References

- Rahman S, Li J, Bopassa JC, Umar S, Iorga A, Partownavid P, Eghbali M: Phosphorylation of GSK-3 $\beta$  mediates intralipid-induced cardioprotection against ischemia/reperfusion injury. *ANESTHESIOLOGY* 2011; 115:242–53
- Li J, Iorga A, Sharma S, Youn JY, Partow-Navid R, Umar S, Cai H, Rahman S, Eghbali M: Intralipid, a clinically safe compound, protects the heart against ischemia-reperfusion injury more efficiently than cyclosporine-A. *ANESTHESIOLOGY* 2012; 117:836–46
- Umar S, Nadadur RD, Li J, Maltese F, Partownavid P, van der Laarse A, Eghbali M: Intralipid prevents and rescues fatal pulmonary arterial hypertension and right ventricular failure in rats. *Hypertension* 2011; 58:512–8
- Weinberg G, Ripper R, Feinstein DL, Hoffman W: Lipid emulsion infusion rescues dogs from bupivacaine-induced cardiac toxicity. *Reg Anesth Pain Med* 2003; 28:198–202
- Rosenblatt MA, Abel M, Fischer GW, Itzkovich CJ, Eisenkraft JB: Successful use of a 20% lipid emulsion to resuscitate a patient after a presumed bupivacaine-related cardiac arrest. *ANESTHESIOLOGY* 2006; 105:217–8
- Feng J, Lucchinetti E, Ahuja P, Pasch T, Perriard JC, Zaugg M: Isoflurane postconditioning prevents opening of the mitochondrial permeability transition pore through inhibition of glycogen synthase kinase 3 $\beta$ . *ANESTHESIOLOGY* 2005; 103:987–95
- Huhn R, Heinen A, Weber NC, Kerindongo RP, Oei GT, Hollmann MW, Schlack W, Preckel B: Helium-induced early preconditioning and postconditioning are abolished in obese Zucker rats *in vivo*. *J Pharmacol Exp Ther* 2009; 329:600–7
- Nordenström J, Thörne A: Comparative studies on a new concentrated fat emulsion: Intralipid 30% *vs.* 20%. *Clin Nutr* 1993; 12:160–7
- Morris S, Simmer K, Gibson R: Characterization of fatty acid clearance in premature neonates during intralipid infusion. *Pediatr Res* 1998; 43:245–9
- Partownavid P, Umar S, Li J, Rahman S, Eghbali M: Fatty-acid oxidation and calcium homeostasis are involved in the rescue of bupivacaine-induced cardiotoxicity by lipid emulsion in rats. *Crit Care Med* 2012; 40:2431–7
- Podgoreanu MV, Ma Q, Mackensen GB, Zhang Z, Kohl F, Smith M, Bain J, Newgard C, Drew K, Barnes B: Metabolic correlates of cardioprotection following deep hypothermic circulatory arrest in hibernating arctic ground squirrels. Presented at: Annual Meeting of American Society of Anesthesiologists, Chicago, Illinois: A0008, October 15, 2011
- Podgoreanu M, Ma Q, Zhang Z, Bain J, Newgard C, Riess M, Barnes B: The cardioprotective phenotype in mammalian hibernators is associated with attenuation of reperfusion-induced nuclear factor-kappa B regulated myocardial inflammation. *Circulation* 2012; 126: A1952.
- Hausenloy DJ, Boston-Griffiths EA, Yellon DM: Cyclosporin A and cardioprotection: From investigative tool to therapeutic agent. *Br J Pharmacol* 2012; 165:1235–45

(Accepted for publication January 29, 2013.)

## In Reply:

We thank Drs. Riess and Podgoreanu for highlighting our recent findings<sup>1–4</sup> on intralipid and raising all these important questions about the mechanisms underlying the cardioprotective action of one of the most promising agents.

In the acute cardioprotective action of intralipid as in ischemia-reperfusion injury<sup>2</sup> and bupivacaine overdose,<sup>3</sup> inhibition of mitochondrial permeability transition pore (mPTP) opening seems to be one of the key mechanisms. We found that inhibition of mPTP by intralipid is due to increased phosphorylation of glycogen synthase kinase 3  $\beta$ <sup>1</sup> and/or decreased pH by improving mitochondrial electron transport chain function through fatty acid oxidation pathway.<sup>3</sup> The fact that cyclosporine-A, which inhibits the opening of the mPTP as efficiently as intralipid, is not able to reduce the infarct size and improve the heart function as intralipid,<sup>1</sup> may suggest that inhibition of mPTP opening, although necessary, certainly is not the only mechanism underlying intralipid-induced cardioprotection. However, it is important to note that the effect of cyclosporine-A on the mPTP is not selective, because cyclosporine-A can also inhibit the phosphatase calcineurin activity.<sup>5</sup> This interaction of cyclosporine-A with phosphatase calcineurin is independent of its action on mPTP.<sup>5</sup> However, it is possible that the effect of cyclosporine-A on calcineurin may limit the cyclosporine-A-induced cardioprotection. Therefore, to clarify whether there is a correlation between the degree of functional and tissue protection with inhibition of mPTP opening, intralipid must be compared with a nonimmunosuppressive cyclosporine-A

Support was provided by National Institutes of Health (Bethesda, Maryland) grant HL089876.
